# Supplementary material for: Physicochemical Characterization of a Cellulosic Film Modified with Two Room-Temperature Ionic Liquids
Source: MDPI journal article supplement (doi:10.3390/app122010290), 2022-10-13
Supplement: s1 [file s1]

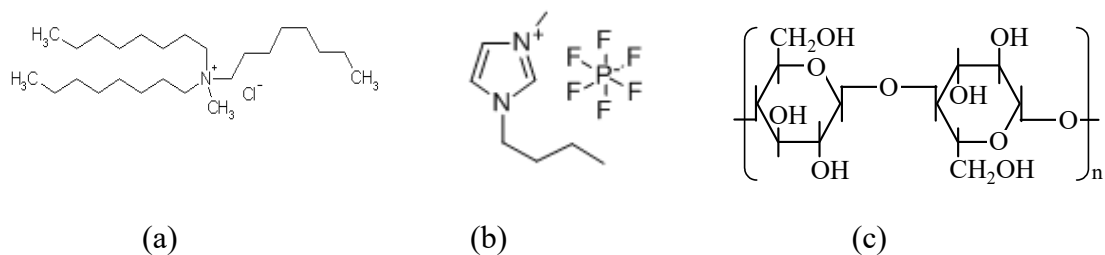

**Figure S1.** Chemical formula of: (a) AliquatCl IL, (b) BMIMPF<sub>6</sub>, and (c) regenerated cellulose.

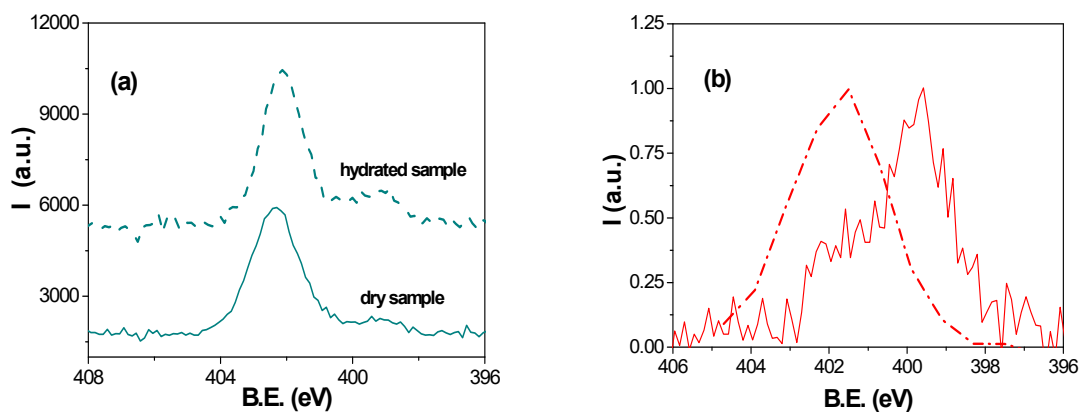

**Figure S2.** (a) Comparison of N 1s core level signal determined for a 40%CTA+60%AliquaCl sample in dry (blue solid line) and hydrated (blue dashed line) states. (b) Comparison of normalized N 1s core level signal for the RC/BMIMPF<sub>6</sub> film (red solid line) and BMIMPF<sub>6</sub> IL (red dashed line).

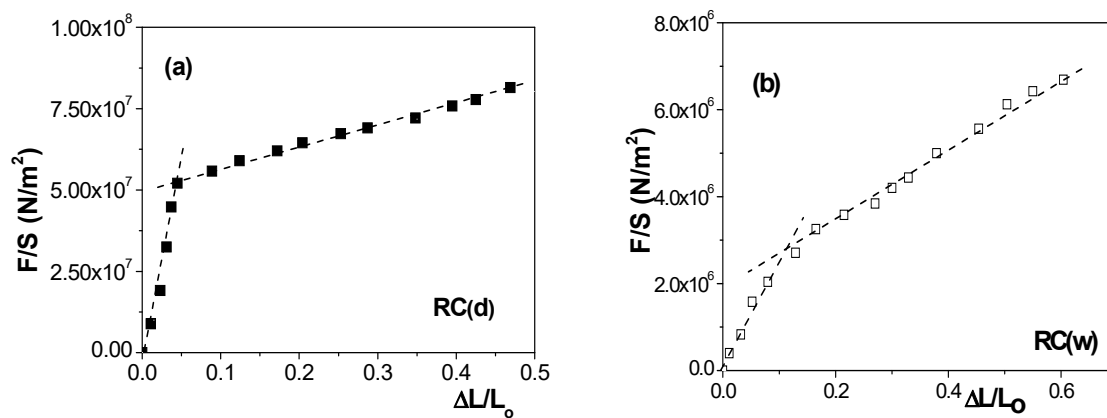

**Figure S3.** Stain vs stress curves measured with: (a) a dry RC film, (b) a wet RC film (after 72 h in distilled water).

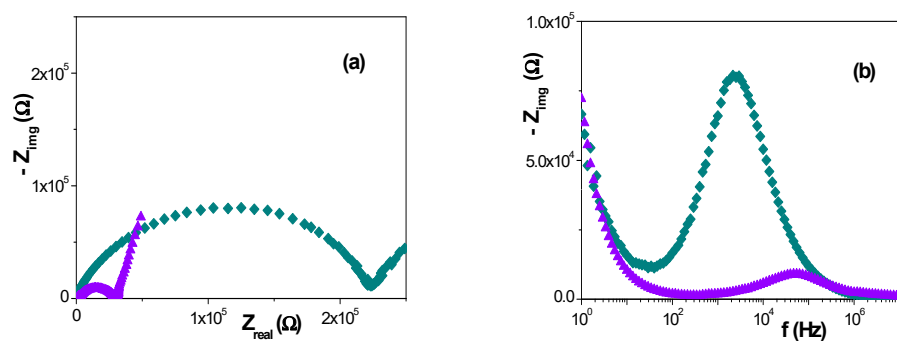

**Figure S4.** Impedance plots for two CTA/AliquatCl membranes with different AliquatCl content: 30 % AliquatCl and 70 % CTA (♦), 60 % AliquatCl and 40 % CTA (▲). (a) Nyquist plot, (b) Bode plot.  $f_{\max}$  for the 30 % AliquatCl and 70 % CTA sample: 2580 Hz;  $f_{\max}$  for the 60 % AliquatCl and 40 % CTA sample: 80000 Hz.

**Table S1.** Atomic concentration percentages of the elements detected on the surfaces\* of the BMIMPF<sub>6</sub> and AliquatCl ILs and the RC-support film.

| Sample                 | C (%) | N (%) | F (%) | P (%) | Cl (%) | O (%) | Si (%) |
|------------------------|-------|-------|-------|-------|--------|-------|--------|
| BMIMPF <sub>6</sub> IL | 49.0  | 10.6  | 33.2  | 6.4   |        | 0.8   |        |
| AliquatCl IL           | 93.2  | 3.5   |       |       | 3.3    |       |        |
| RC film                | 62.1  | 0.3   |       |       |        | 35.2  | 2.2    |

\* measurements performed at 45° take off angle.
